# Supplementary material for: Ambipolar operation of progressively designed symmetric bidirectional transistors fabricated using single-channel vertical transistor and electrochemically prepared copper oxide
Source: Royal Society of Chemistry journal article supplement (doi:10.1039/d2mh01413k), 2023-01-01
Supplement: d2mh01413k1.pdf [file d2mh01413k1.pdf]

# Supporting Information

## *Ambipolar Operation of Progressively Designed Symmetric Bidirectional Transistors Fabricated Using Single-channel Vertical Transistor and Electrochemically Prepared Copper Oxide*

*Sung Hyeon Jung,<sup>‡</sup> Ji Sook Yang,<sup>‡</sup> and Hyung Koun Cho\**

\* Corresponding author: H. K. Cho; e-mail ([chohk@skku.edu](mailto:chohk@skku.edu))

### Table of Content

Figure S1 Electrical performances using high-conductivity *p*-type Cu<sub>2</sub>O channel

Figure S2 Electrical performances of OPT-free vertical *p*-type Cu<sub>2</sub>O

Figure S3 Electrical stability of SBT device during continuous operation

Figure S4 Hysteresis characteristics of SBT device

Figure S5 Structure and dimension of SBT device

Figure S6 Schematic diagram of effect of O<sub>2</sub> plasma treatment process at SBT device

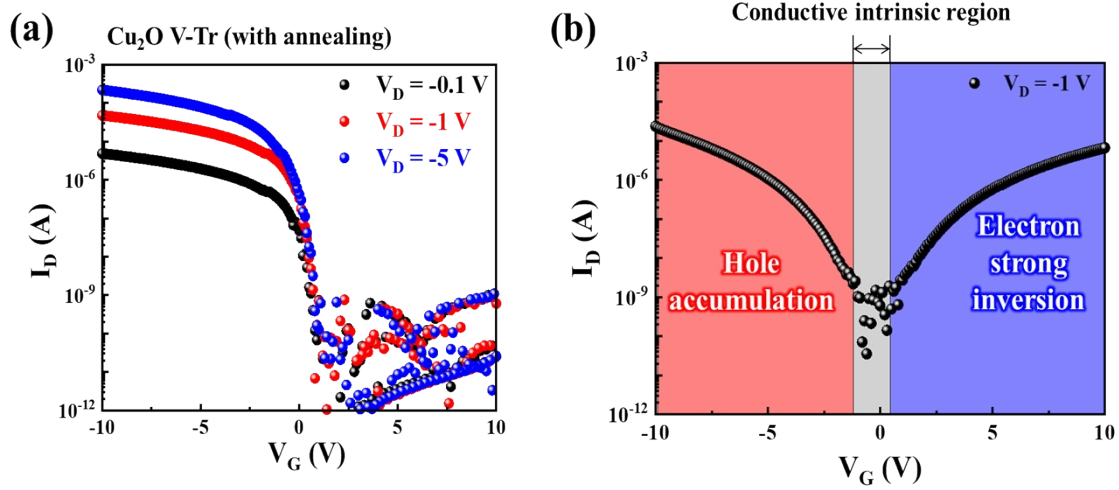

**Figure S1.** Electrical performances of vertical transistor device fabricated using high-conductivity *p*-type Cu<sub>2</sub>O channel. Transfer curves for (a) annealed and (b) annealed and OPT-treated transistors.

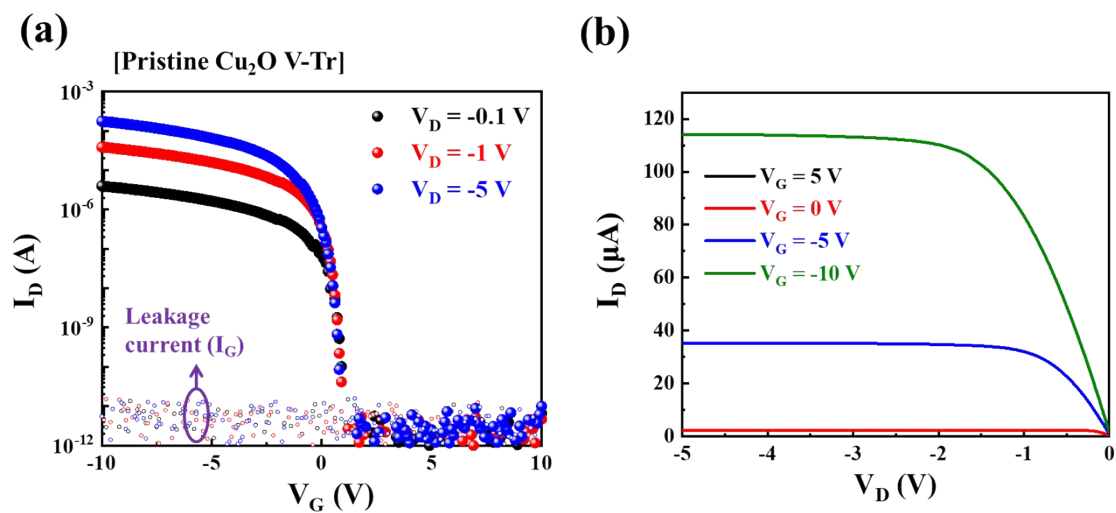

**Figure S2.** Electrical performances of OPT-free vertical  $p$ -type  $\text{Cu}_2\text{O}$  transistor exhibiting unipolar characteristics: (a) Transfer and (b) Output curves.

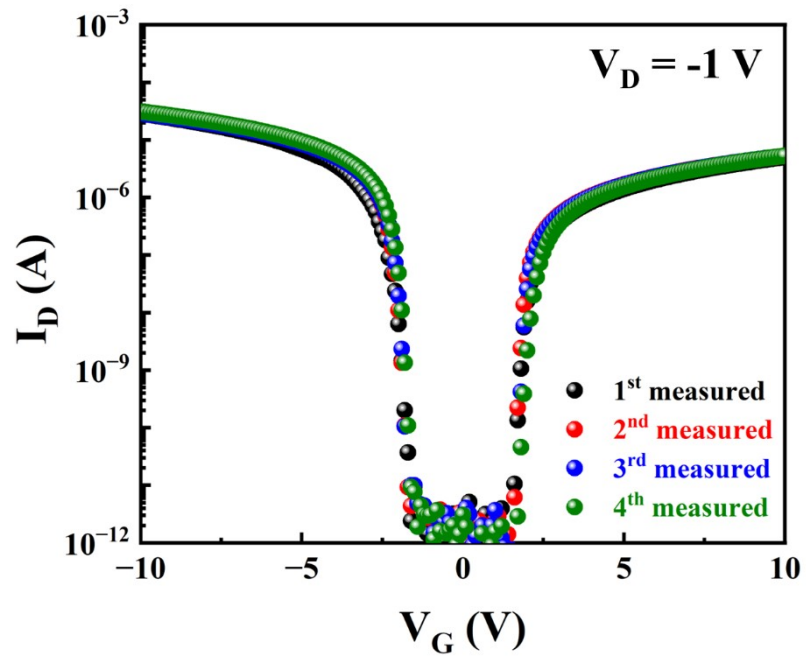

**Figure S3.** Repeated measurements used to build the transfer curve for the same SBT device.

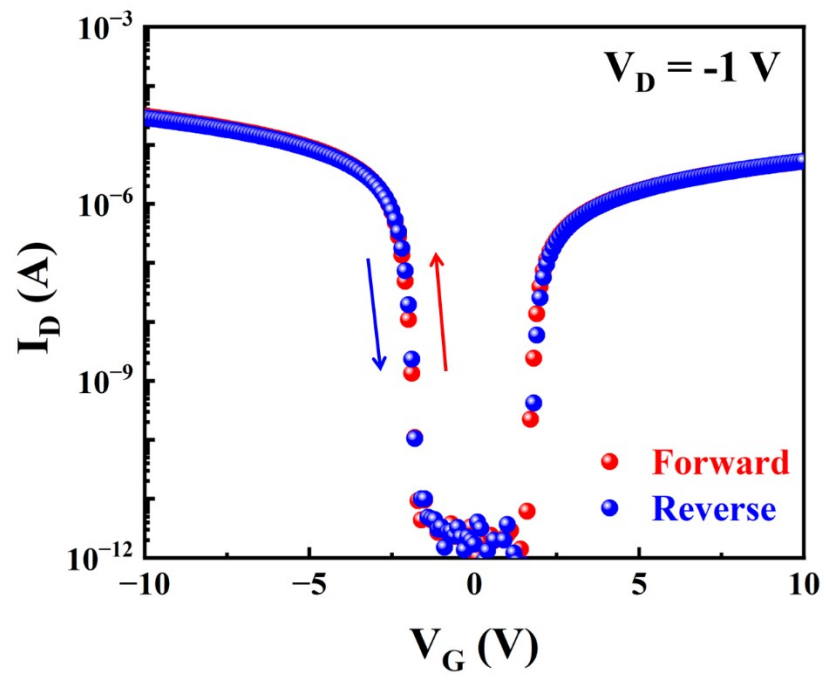

**Figure S4.** Hysteresis curve of an SBT device (500 nm thick  $\text{Cu}_2\text{O}$  layer) at  $V_D = -1$  V.

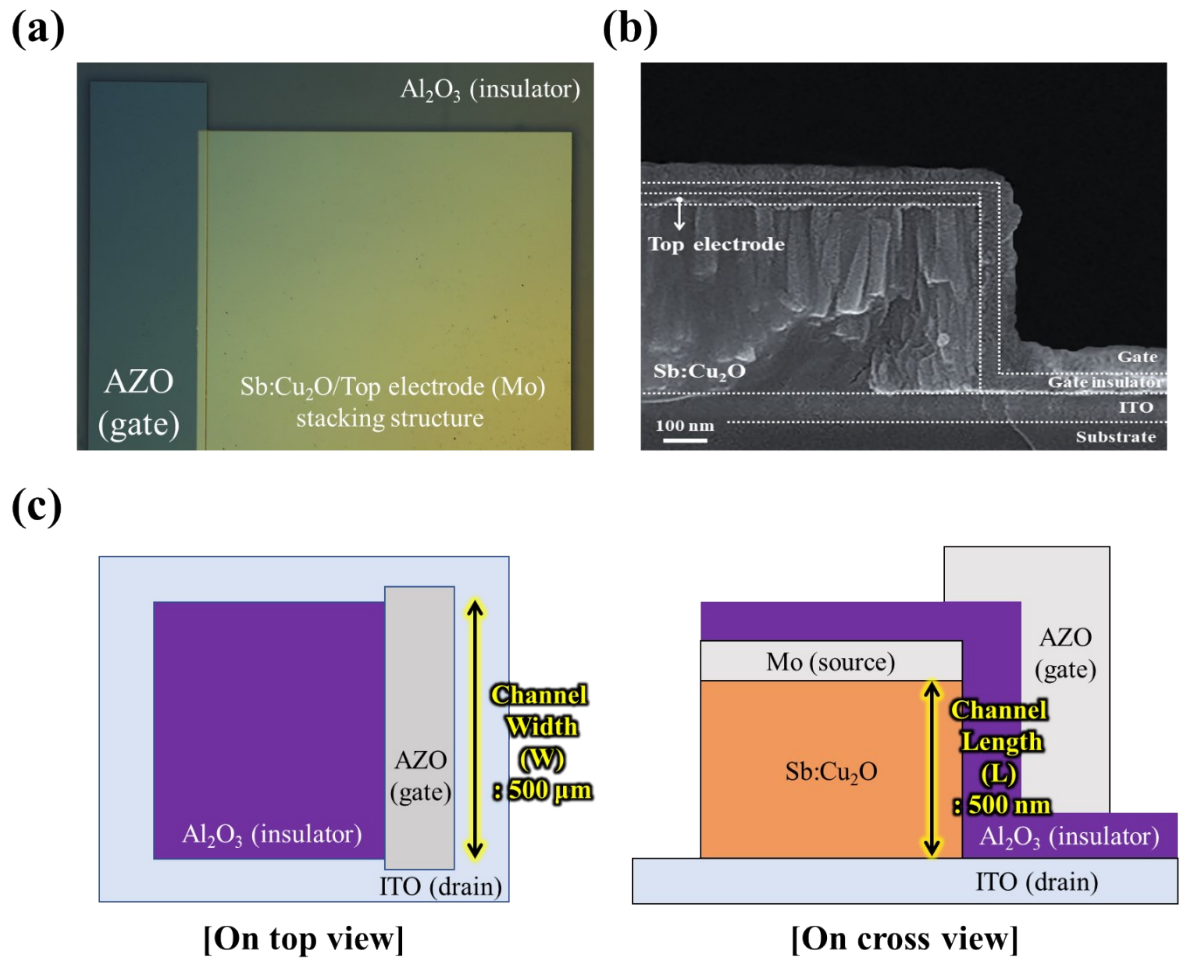

**Figure S5.** Structure and dimension of an SBT device: (a) optical micrograph, (b) cross-sectional SEM image, and (c) schematic of an SBT device including dimensions.

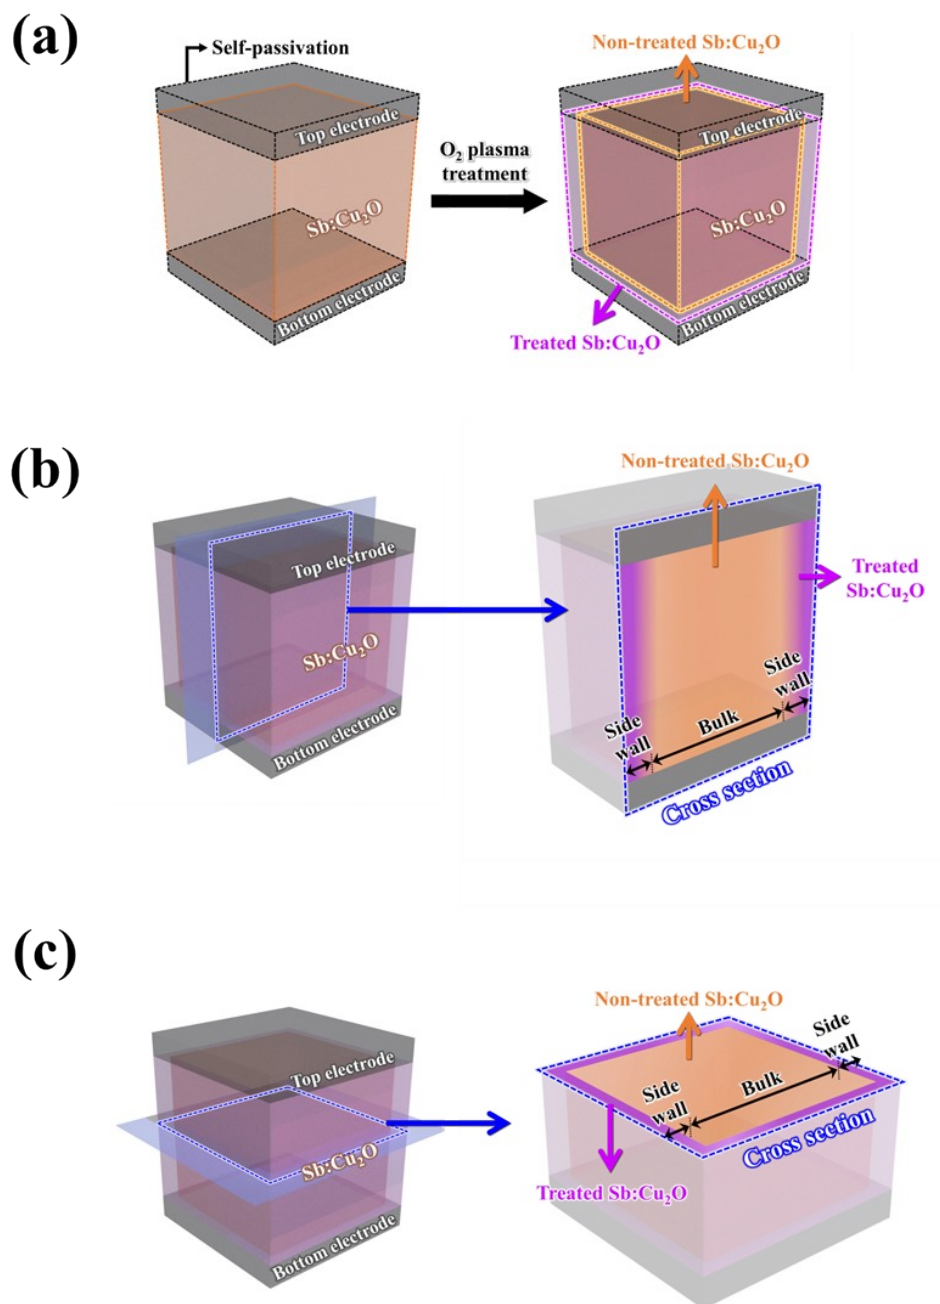

**Figure S6.** Schematic of a  $\text{Cu}_2\text{O}$  active layer used to evaluate the effect of  $\text{O}_2$  plasma treatment (a)  $\text{Cu}_2\text{O}$  active layer before and after treatment. Non-treated and  $\text{O}_2$ -plasma-treated regions along the (b) vertical and (c) horizontal directions. The non-treated and treated regions are shown in orange and purple, respectively.
